# Supplementary material
Source: PubMed Central journal article supplement (PMC5674154)
Supplement: cr2017110x1.pdf [file cr2017110x1.pdf]

## Supplementary information, Figure S1

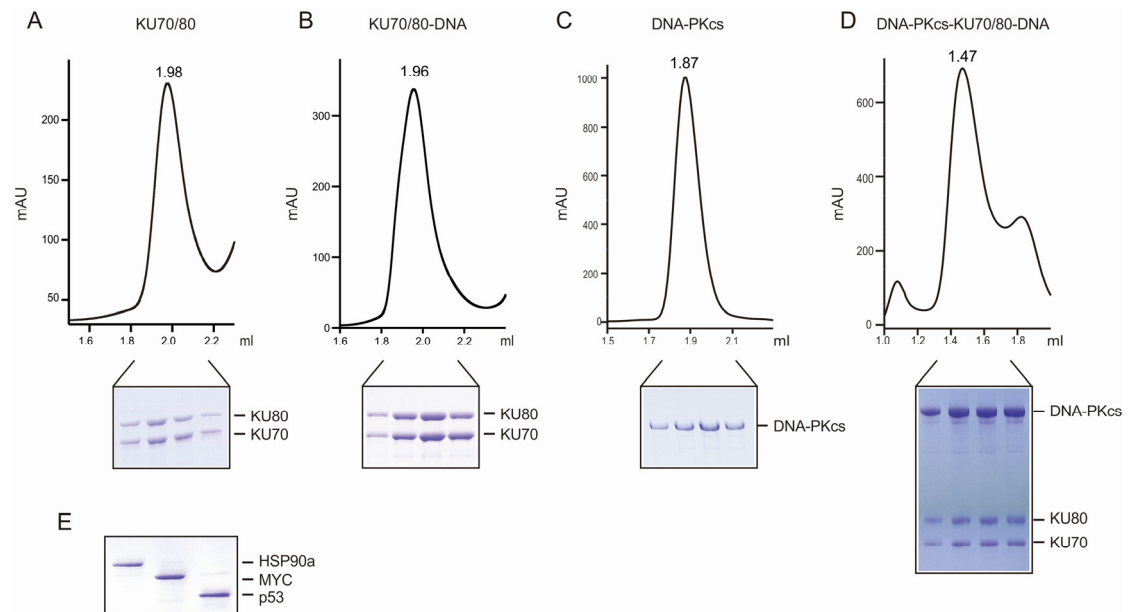

**Figure S1 Complex preparation of DNA-PK. (A-D)** Purification of KU70/80 (A), KU70/80-DNA (B), DNA-PKcs (C), DNA-PK complex (D), and substrates (HSP90a, MYC and p53) for kinase activity assays (E). The gel filtration profiles are shown with the corresponding retention volume indicated. Peak fractions were subjected to SDS-PAGE and visualized with coomassie brilliant blue staining.
