# Supplementary material
Source: PubMed Central journal article supplement (PMC5674154)
Supplement: cr2017110x2.pdf [file cr2017110x2.pdf]

## Supplementary information, Figure S2

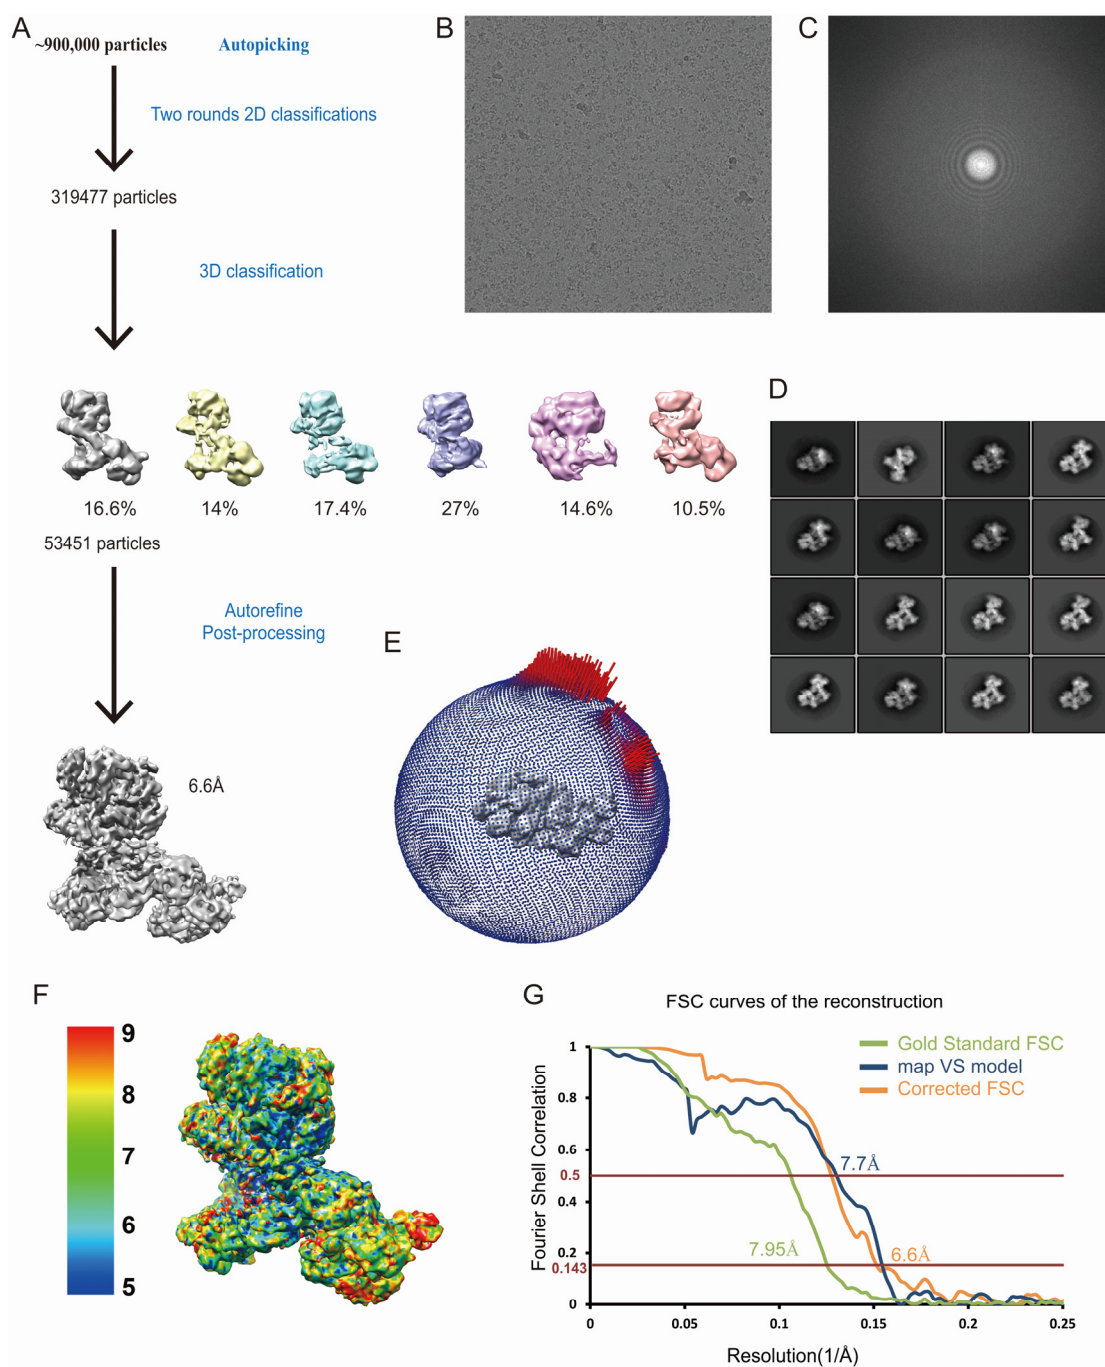

**Figure S2 Cryo-EM structure determination.** (A) Flow-chart of cryo-EM data processing. (B-C) Representative cryo-EM micrograph of DNA-PK (B) and its Fourier transformation (C). (D) Representative views of the 2D class average of cryo-EM DNA-PK particles. (E) Angular distribution of cryo-EM DNA-PK used for final

structural reconstruction. **(F)** FSC curves for the final 3D maps. **(G)** Local resolution map of DNA-PK calculated by ResMap.
