# Supplementary material
Source: PubMed Central journal article supplement (PMC5674154)
Supplement: cr2017110x4.pdf [file cr2017110x4.pdf]

## Supplementary information, Figure S4

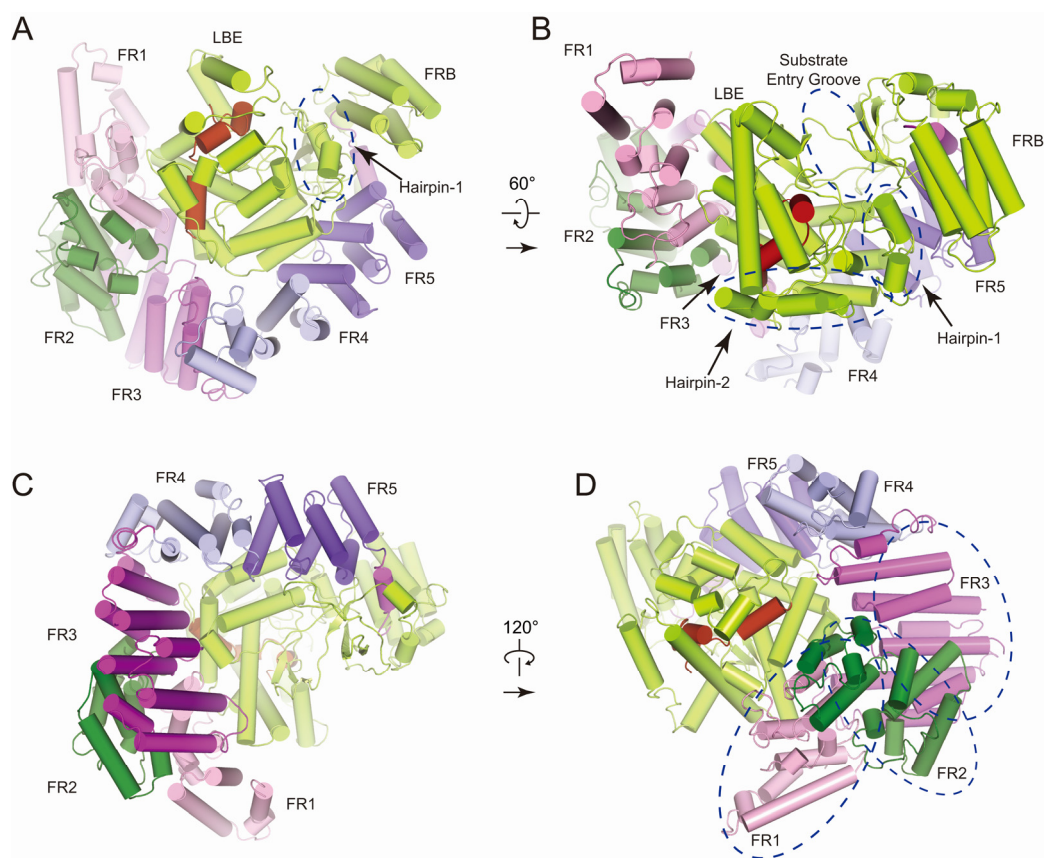

**Figure S4 Structure of the Core<sup>DNA-PKcs</sup>.** (A-D) Four different views of Core<sup>DNA-PKcs</sup>. The FAT domain consists of five regions, FR1 to FR5, which are colored in pink, green, purple, lightblue, and blue, respectively. The kinase domain is colored in lemon, FATC in red. Two  $\alpha$ -hairpins and the potential substrate entry groove are indicated. Note that Hairpin-1 is predicted to block substrate entry, and Hairpin-2 is unique in DNA-PKcs among PIKK family members.
