# Supplementary material
Source: PubMed Central journal article supplement (PMC5674154)
Supplement: cr2017110x6.pdf [file cr2017110x6.pdf]

## Supplementary information, Figure S6

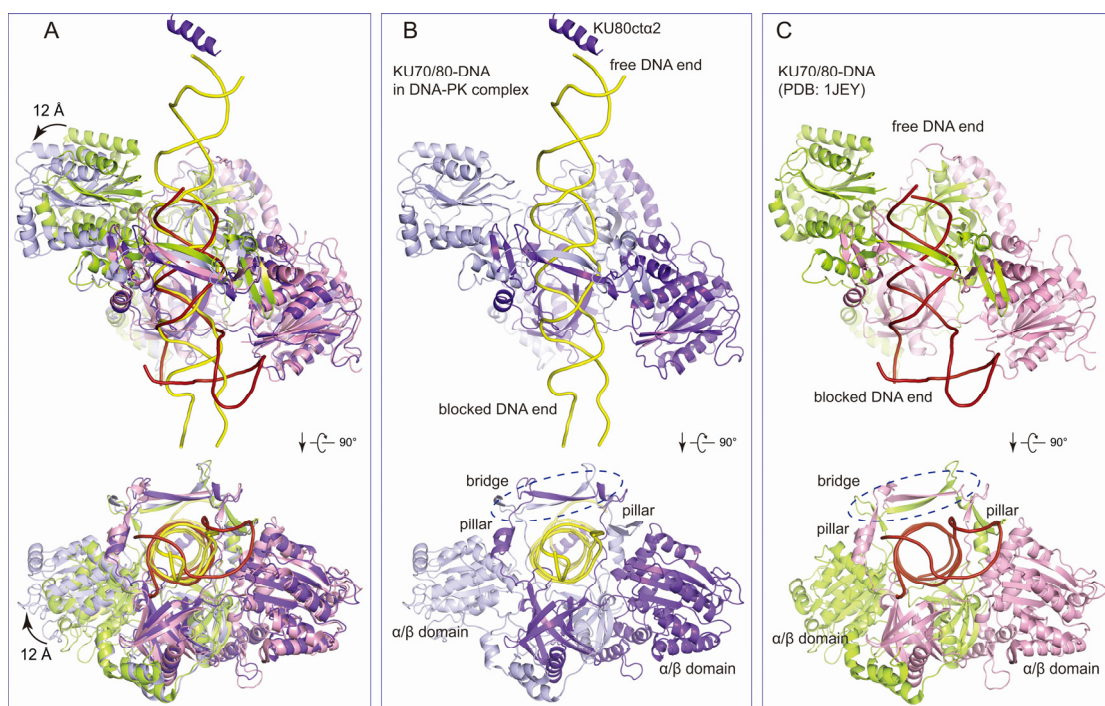

**Figure S6 Structures of KU70/80-DNA.** (A) Superimposition of KU70/80-DNA structures in the absence of DNA-PKcs (previously reported crystal structure, PDB: 1JEY) and within DNA-PK complex (holo form). Ribbon representations are shown in two different views. In the DNA-PK complex, KU70 is colored in lightblue, KU80 in blue, and DNA in yellow. In the KU70/80-DNA, KU70 is colored in lemon, KU80 in pink, and DNA in red. Note that KU80 molecules are almost identical in the two structures, whereas KU70 undergoes conformational changes upon DNA-PK complex formation. (B-C) KU70/80-DNA structures in the DNA-PK complex (B) and KU70/80-DNA (C) are shown as in A.
