# Supplementary material
Source: PubMed Central journal article supplement (PMC5674154)
Supplement: cr2017110x8.pdf [file cr2017110x8.pdf]

## Supplementary information, Figure S8

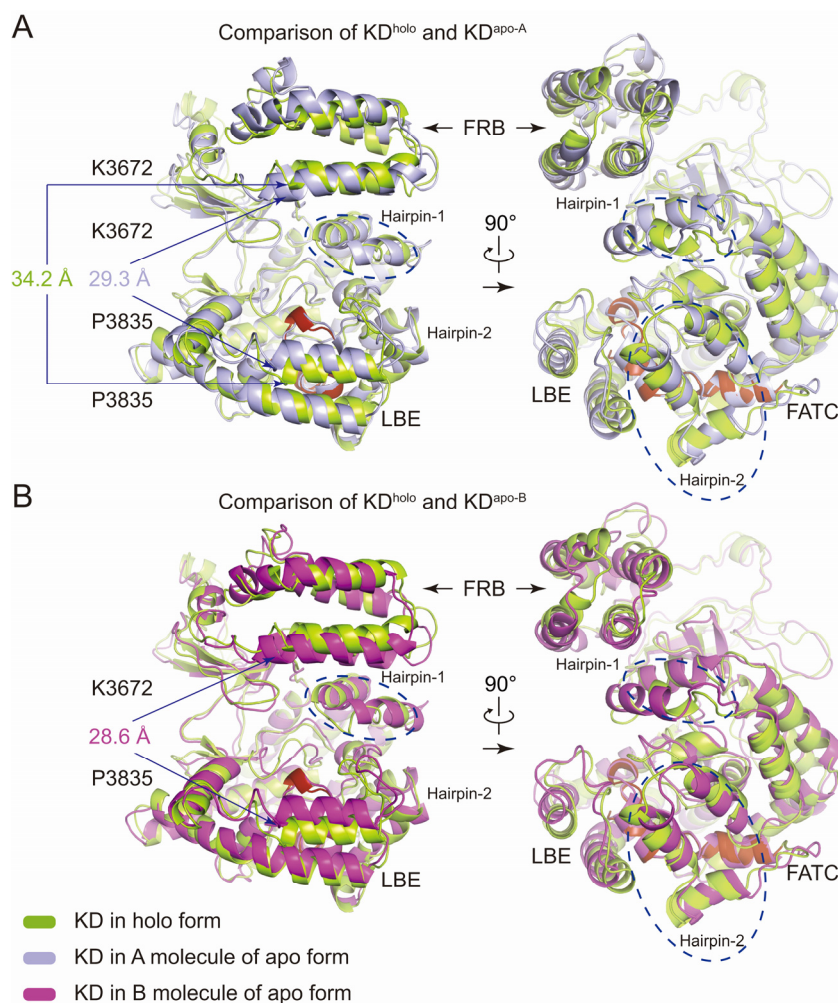

**Figure S8 Structural comparison of the kinase domains of DNA-PKcs in apo form and holo form.** Superimposition of the kinase domains of DNA-PKcs in the holo form and molecule A (**A**) or molecule B (**B**) in the asymmetric unit of the crystals of the apo form (PDB: 5LUQ). Ribbon representations are shown in two different views. Kinase domains are colored as indicated. Note that the two parallel helices (FRB $\alpha$ 4 and LBE $\alpha$ 1) on top of both sides are 34.2 Å (distance between C $\alpha$  of K3672 and C $\alpha$  of P3835) apart from each other, compared to 28.6/29.3 Å in the apo conformation (A/B molecule in apo form).
