# Supplementary material
Source: PubMed Central journal article supplement (PMC5674154)
Supplement: cr2017110x9.pdf [file cr2017110x9.pdf]

**Supplementary information, Table S1 Statistics for data collection and model refinement of DNA-PK complex**

| Data collection                                 |         |
|-------------------------------------------------|---------|
| Particles for refinement                        | 53451   |
| Pixel Size (Å)                                  | 1.3     |
| Defocus range (µm)                              | 1.8-4.5 |
| Electron dose (e <sup>-</sup> /Å <sup>2</sup> ) | 50      |
| Refinement                                      |         |
| CC across whole map volume                      | 89.05 % |
| CC only across atoms in the model               | 80.36 % |
| R.m.s deviations                                |         |
| Bond lengths (Å)                                | 0.013   |
| Bond angles (°)                                 | 1.499   |
| Ramachandran plot statistics                    |         |
| Most favored (%)                                | 73.92   |
| Disallowed (%)                                  | 3.4     |
| All-atom clashscore                             | 72.22   |
