# Supplementary material
Source: PubMed Central journal article supplement (PMC5674154)
Supplement: cr2017110x10.pdf [file cr2017110x10.pdf]

**Supplementary information, Table S2 Oligonucleotides used in this work**

| Oligo          | sequence*                                                          | Ref |
|----------------|--------------------------------------------------------------------|-----|
| Y shaped DNA-F | biotin-CGCGCCCAGCTTTCCCAGCTAATAAA<br>CTAAAAACTATTATTATGGCCGCACGCGT | [1] |
| Y shaped DNA-R | ACGCGTGCGGCCATAATAATAGTTTTTAGTTTAT<br>TGGGCGCG                     |     |

\* All sequences are shown in 5' to 3' direction with biotin labeled as indicated.
